# Supplementary material
Source: MDPI journal article supplement (https://www.mdpi.com/1996-1073/15/15/5536)
Supplement: s1 [file s1]

# Potentials of Renewable Energy Sources in Germany and the Influence of Land Use Datasets (Supplementary Material)

Stanley Risch, Rachel Maier, Junsong Du, Noah Pflugradt, Peter Stenzel, Leander Kotzur and Detlef Stolten

## General Feature Definition

**Table S1**

Feature definition. Filename is given if different files are applied for one dataset.

| Criterion              | Dataset                              | Filename / Query           | Filter or code                                                                                                                    |
|------------------------|--------------------------------------|----------------------------|-----------------------------------------------------------------------------------------------------------------------------------|
| <b>Lake</b>            | Basis-DLM [1]                        | ver04_f                    | OBJART_TXT='AX_Hafenbecken' OR<br>OBJART_TXT='AX_StehendesGewaesser'                                                              |
|                        | OSM [2] retrieved from Geofabrik [3] | gis_osm_transport_a_free_1 | fclass not in ('river','riverbank','drain','canal','tidal_channel')                                                               |
|                        | CLC [4]                              |                            | Code_18 in ('512','521')                                                                                                          |
| <b>River</b>           | Basis-DLM [1]                        | gew01_f                    | OBJART_TXT='AX_Fliessgewaesser' OR<br>OBJART_TXT='AX_Kanal' OR<br>OBJART_TXT='AX_Wasserlauf' OR<br>OBJART_TXT='AX_Gewaesserachse' |
|                        | OSM [2] retrieved from Geofabrik [3] | gis_osm_water_a_free_1     | fclass='river' OR<br>fclass='drain' OR<br>fclass='canal' OR<br>fclass='tidal_channel' OR<br>fclass='riverbank'                    |
|                        | CLC [4]                              |                            | Code_18 in ('511','522')                                                                                                          |
| <b>Stream</b>          | OSM [2] retrieved from Geofabrik [3] | gis_osm_waterways_free_1   | fclass='stream' OR<br>fclass='ditch'                                                                                              |
| <b>Motorway</b>        | Basis-DLM [1]                        | ver01_l                    | WDM = '1301'                                                                                                                      |
|                        |                                      | ver01_f                    | OBJART_TXT = 'AX_Platz' and FKT != '5310'                                                                                         |
|                        | OSM [2] retrieved from Geofabrik [3] | gis_osm_roads_free_1       | fclass in ('motorway','motorway_link')                                                                                            |
| <b>Primary roads</b>   | Basis-DLM [1]                        | ver01_l                    | WDM = '1303'                                                                                                                      |
|                        | OSM [2] retrieved from Geofabrik [3] | gis_osm_roads_free_1       | fclass in ('primary','primary_link')                                                                                              |
| <b>Secondary roads</b> | Basis-DLM [1]                        | ver01_l                    | WDM = '1305'                                                                                                                      |
|                        | OSM [2] retrieved from Geofabrik [3] | gis_osm_roads_free_1       | fclass in ('secondary','secondary_link')                                                                                          |

|                       |                                                                      |                                                                                                                                      |                                                                                                              |
|-----------------------|----------------------------------------------------------------------|--------------------------------------------------------------------------------------------------------------------------------------|--------------------------------------------------------------------------------------------------------------|
| <b>Regional roads</b> | Basis-DLM [1]                                                        | ver01_l                                                                                                                              | WDM != '1301' AND<br>WDM != '1303' AND<br>WDM != '1305'                                                      |
|                       | OSM [2] retrieved from<br>Geofabrik [3]                              | gis_osm_roads_free_1                                                                                                                 | fclass = ('residential',<br>'tertiary', 'tertiary_link')                                                     |
| <b>Railways</b>       | Basis-DLM [1]                                                        | ver03_l                                                                                                                              | OBJART_TXT =<br>'AX_Bahnstrecke'                                                                             |
|                       |                                                                      | ver03_f                                                                                                                              | None                                                                                                         |
|                       |                                                                      | ver06_f                                                                                                                              | OBJART_TXT =<br>'AX_Bahnverkehrsanlage'                                                                      |
|                       | OSM [2] retrieved from<br>Geofabrik [3]                              | gis_osm_railways_free_1                                                                                                              | None                                                                                                         |
| <b>Power lines</b>    | Basis-DLM [1]                                                        | sie03_l                                                                                                                              | OBJART_TXT='AX_Leitung'                                                                                      |
|                       | OSM [2] retrieved from<br>Overpass-Turbo [5]<br>(query on the right) | [out:json]<br>[timeout:250];<br>area[name="Deutschland"]->.searchArea;<br>(way[power=line](area.searchArea));<br>(.;>);<br>out meta; | None                                                                                                         |
| <b>Farmland</b>       | Basis-DLM [1]                                                        | veg01_f                                                                                                                              | VEG != '1020'                                                                                                |
|                       | OSM [2] retrieved from<br>Geofabrik [3]                              | gis_osm_landuse_a_free_1                                                                                                             | fclass='farmland' OR<br>fclass='orchard' OR<br>fclass='vineyard'                                             |
|                       | CLC [4]                                                              |                                                                                                                                      | Code_18 in<br>( '211', '212', '213',<br>'221', '222', '223',<br>'241', '242', '243', '244')                  |
| <b>Grassland</b>      | Basis-DLM [1]                                                        | veg01_f                                                                                                                              | VEG = '1020'                                                                                                 |
|                       | OSM [2] retrieved from<br>Geofabrik [3]                              | gis_osm_landuse_a_free_1                                                                                                             | fclass='grass' OR<br>fclass='meadow'                                                                         |
|                       | CLC [4]                                                              |                                                                                                                                      | Code_18='231'                                                                                                |
| <b>Forests</b>        | Basis-DLM [1]                                                        | veg02_f                                                                                                                              | None                                                                                                         |
|                       | OSM [2] retrieved from<br>Geofabrik [3]                              | gis_osm_landuse_a_free_1                                                                                                             | fclass='forest'                                                                                              |
|                       | CLC [4]                                                              |                                                                                                                                      | Code_18 in<br>( '311', '312', '313')                                                                         |
| <b>Trees</b>          | Basis-DLM [1]                                                        | veg03_f                                                                                                                              | OBJART_TXT =<br>'AX_Gehoeolz'                                                                                |
| <b>Residential</b>    | Basis-DLM [1]                                                        | sie02_f                                                                                                                              | OBJART = '41001' OR<br>(OBJART='41007' AND<br>FKT in ('1110', '1120',<br>'1130', '1150', '1160',<br>'1170')) |
|                       | OSM [2] retrieved from<br>Geofabrik [3]                              | gis_osm_landuse_a_free_1                                                                                                             | fclass='residential' OR<br>fclass='retail' OR<br>fclass='allotments'                                         |
|                       | CLC [4]                                                              |                                                                                                                                      | Code_18='111' OR<br>Code_18='112' OR                                                                         |

|                                           |                                                                      |                                                                                                                                                   |                                                                                                                                                                                                                                                                     |
|-------------------------------------------|----------------------------------------------------------------------|---------------------------------------------------------------------------------------------------------------------------------------------------|---------------------------------------------------------------------------------------------------------------------------------------------------------------------------------------------------------------------------------------------------------------------|
|                                           |                                                                      |                                                                                                                                                   | Code_18='133' OR<br>Code_18='141' OR<br>Code_18='142'                                                                                                                                                                                                               |
| <b>Inner areas</b>                        | Basis-DLM [1]                                                        | sie01_f                                                                                                                                           | None                                                                                                                                                                                                                                                                |
| <b>Outer areas</b>                        | Basis-DLM [1]                                                        | sie02_f                                                                                                                                           | OBJART = '41001' OR<br>(OBJART='41007' AND<br>FKT in('1110', '1120',<br>'1130', '1150', '1160',<br>'1170'))                                                                                                                                                         |
| <b>Buildings<br/>residential</b>          | Hausumringe [6]                                                      |                                                                                                                                                   | GFK IN ('31001_1000',<br>'31001_1010',<br>'31001_1020',<br>'31001_1021',<br>'31001_1022',<br>'31001_1023',<br>'31001_1024',<br>'31001_1025',<br>'31001_1210',<br>'31001_3064',<br>'31001_3066',<br>'31001_2070',<br>'31001_2071',<br>'31001_2072',<br>'31001_2074') |
| <b>Buildings<br/>health<br/>treatment</b> | Hausumringe [6]                                                      |                                                                                                                                                   | GFK IN ('31001_3240',<br>'31001_3241',<br>'31001_3242',<br>'31001_3051',<br>'31001_3052')                                                                                                                                                                           |
| <b>Buildings<br/>mixed</b>                | Hausumringe [6]                                                      |                                                                                                                                                   | GFK IN ('31001_1100',<br>'31001_1110',<br>'31001_1120',<br>'31001_1121',<br>'31001_1122',<br>'31001_1123',<br>'31001_1130',<br>'31001_1220',<br>'31001_1221',<br>'31001_1223')                                                                                      |
| <b>Buildings all</b>                      | Hausumringe [6]                                                      |                                                                                                                                                   | None                                                                                                                                                                                                                                                                |
| <b>Camping</b>                            | Basis-DLM [1]                                                        | sie02_f                                                                                                                                           | FKT = '4330'                                                                                                                                                                                                                                                        |
| <b>Industrial/<br/>Commercial</b>         | Basis-DLM [1]                                                        | sie02_f                                                                                                                                           | OBJART = '41002'                                                                                                                                                                                                                                                    |
|                                           | OSM [2] retrieved from<br>Geofabrik [3]                              | gis_osm_landuse_a_free_1                                                                                                                          | fclass in ('commercial',<br>'industrial')                                                                                                                                                                                                                           |
|                                           | CLC [4]                                                              |                                                                                                                                                   | Code_18='121'                                                                                                                                                                                                                                                       |
| <b>VOR</b>                                | OSM [2] retrieved from<br>Overpass-Turbo [5]<br>(query on the right) | [out:json]<br>[timeout:250];<br>area[name="Deutschland"]-<br>>.searchArea;<br>(node[airmark=beacon](area.search<br>Area));<br>(.;>);<br>out meta; | "beacon_typ" in ( 'VOR', 'VOR-DME',<br>'VOR/DME',<br>'VOR;DME' ,<br>'VOR;TACAN' ) or<br>"type" in ( 'VOR/DME'<br>) or "beacon_t_1" in<br>( 'VOR', 'VOR;TACAN')                                                                                                      |

|                                    |                                                                |                                                                                                                                           |                                                                                                                                                    |
|------------------------------------|----------------------------------------------------------------|-------------------------------------------------------------------------------------------------------------------------------------------|----------------------------------------------------------------------------------------------------------------------------------------------------|
| <b>D-VOR</b>                       | OSM [2] retrieved from Overpass-Turbo [5] (query on the right) | [out:json]<br>[timeout:250];<br>area[name="Deutschland"]->.searchArea;<br>(node[airmark=beacon](area.searchArea));<br>(.;>);<br>out meta; | "beacon_tpy" in ( 'DVOR', 'DVOR/DME' , 'DVOR;DME' , 'DVOR;TACAN' , 'DVORTAC' ) or "beacon_t_1" in ( 'DVOR', 'DVOR-DME' , 'DVOR/DME' , 'DVOR;DME' ) |
| <b>Seismic station</b>             | BGR [7]                                                        |                                                                                                                                           | None                                                                                                                                               |
| <b>Airports</b>                    | Basis-DLM [1]                                                  | ver04_f                                                                                                                                   | ART in ('5510', '5511', '5512') OR NTZ in ('2000', '3000') AND ZUS IS NULL                                                                         |
|                                    | OSM [2] retrieved from Geofabrik [3]                           | gis_osm_transport_a_free_1                                                                                                                | fclass = 'airport'                                                                                                                                 |
|                                    | CLC [4]                                                        |                                                                                                                                           | Code_18='124'                                                                                                                                      |
| <b>Airfields</b>                   | Basis-DLM [1]                                                  | ver04_f                                                                                                                                   | ART in ('5520', '5540', '5550') AND (ZUS IS NULL or ZUS = 'None')                                                                                  |
|                                    | OSM [2] retrieved from Geofabrik [3]                           | gis_osm_transport_a_free_1                                                                                                                | fclass = 'airfield' OR fclass = 'apron'                                                                                                            |
| <b>Military</b>                    | Basis-DLM [1]                                                  | geb03_f                                                                                                                                   | ADF = '4720'                                                                                                                                       |
| <b>Mining</b>                      | Basis-DLM [1]                                                  | sie02_f                                                                                                                                   | OBJART = '41005' OR OBJART = '41004'                                                                                                               |
|                                    | OSM [2] retrieved from Geofabrik [3]                           | gis_osm_landuse_a_free_1                                                                                                                  | fclass = 'quarry'                                                                                                                                  |
|                                    | CLC [4]                                                        |                                                                                                                                           | Code_18='131'                                                                                                                                      |
| <b>Recreational</b>                | Basis-DLM [1]                                                  | sie02_f                                                                                                                                   | OBJART = '41008'                                                                                                                                   |
| <b>Cemetery</b>                    | Basis-DLM [1]                                                  | sie02_f                                                                                                                                   | OBJART = '41009'                                                                                                                                   |
| <b>Birds protected areas (SPA)</b> | WDPA [8]                                                       |                                                                                                                                           | DESIG_ENG = 'Special Protection Area (Birds Directive)'                                                                                            |
| <b>Nature reserve (NSG)</b>        | WDPA [8]                                                       |                                                                                                                                           | DESIG_ENG = 'Nature Reserve'                                                                                                                       |
|                                    | Basis-DLM [1]                                                  | geb03_f                                                                                                                                   | ADF = '1621'                                                                                                                                       |
|                                    | OSM [2] retrieved from Geofabrik [3]                           | gis_osm_landuse_a_free_1                                                                                                                  | fclass='nature_reserve'                                                                                                                            |
| <b>National park</b>               | WDPA [8]                                                       |                                                                                                                                           | DESIG_ENG = 'National Park'                                                                                                                        |
|                                    | Basis-DLM [1]                                                  | geb03_f                                                                                                                                   | ADF = '1670'                                                                                                                                       |
|                                    | OSM [2] retrieved from Overpass-Turbo [5] (query on the right) | [out:json]<br>[timeout:250];<br>area[name="Deutschland"]->.searchArea;<br>(<br><br>node["boundary"="national_park"](<br>area.searchArea); |                                                                                                                                                    |

|                                      |                                      |                                                                                       |                                                                                                                                                                                                                                                                        |
|--------------------------------------|--------------------------------------|---------------------------------------------------------------------------------------|------------------------------------------------------------------------------------------------------------------------------------------------------------------------------------------------------------------------------------------------------------------------|
|                                      |                                      | relation["boundary"]="national_park"](area.searchArea);<br>)<br>(. _;>);<br>out meta; |                                                                                                                                                                                                                                                                        |
| <b>FFH</b>                           | WDPA [8]                             |                                                                                       | Desig='Site of Community Importance (Habitats Directive)'                                                                                                                                                                                                              |
| <b>Biosphere (core zones)</b>        | BFN [9]                              | Bio_Zonierung2021_3035                                                                | ZONIERUNG = 'Kernzone'                                                                                                                                                                                                                                                 |
| <b>Biosphere (Maintenance zones)</b> | BFN [9]                              | Bio_Zonierung2021_3035                                                                | ZONIERUNG = 'Pflegezone'                                                                                                                                                                                                                                               |
| <b>Biosphere (Development zones)</b> | BFN [9]                              | Bio_Zonierung2021_3035                                                                | ZONIERUNG = 'Entwicklungszone'                                                                                                                                                                                                                                         |
| <b>Nature park</b>                   | BFN [9]                              | Naturparke2021                                                                        | None                                                                                                                                                                                                                                                                   |
| <b>Ramsar</b>                        | WDPA [8]                             |                                                                                       | Desig='Ramsar Site, Wetland of International Importance'                                                                                                                                                                                                               |
| <b>Protected landscapes</b>          | WDPA [8]                             |                                                                                       | DESIG_ENG = 'Landscape Protection Area'                                                                                                                                                                                                                                |
| <b>Water protection (I&amp;II)</b>   | BfG [10]                             | AM_drinkingWaterProtectionArea-DE                                                     | WSG_ZONE in ( '1' , '1A' , '1B' , '2' , '2A' , '2a' , '2b' , '2B' , '2B1' , '2B2' , 'GW_I' , 'GW_II' , 'I' , 'II' , 'IIA' , 'IIB' , 'IIC' , 'qual I' , 'qual II' , 'TWS I' , 'TWS II' , 'TWS II/1' , 'TWS II/2' , 'TWS II/3' , 'Zone I' , 'Zone II' , 'keine Angabe' ) |
|                                      | LFU-RP [11]                          |                                                                                       | SCHUTZZO_1 in ( 'Zone I' , 'Zone II' , 'Zone II A' , 'Zone II S' )                                                                                                                                                                                                     |
|                                      | LUBW [12]                            |                                                                                       | ZONE in ( 'Zone I und II bzw. IIA' , 'Zone IIB' )                                                                                                                                                                                                                      |
| <b>Historical</b>                    | OSM [2] retrieved from Geofabrik [3] | gis_osm_pois_a_free_1                                                                 | fclass IN ('archaeological', 'monument', 'memorial', 'castle')                                                                                                                                                                                                         |
| <b>Buildings commercial</b>          | Hausumringe [6]                      |                                                                                       | GFK IN ('31001_2000', '31001_2010', '31001_2020', '31001_2030', '31001_2040', '31001_2050', '31001_2051', '31001_2052', '31001_2053', '31001_2054', '31001_2055', '31001_2056', '31001_2060', '31001_2070',                                                            |

|                                    |                                                   |                               |                                                                                                                                                                                                      |
|------------------------------------|---------------------------------------------------|-------------------------------|------------------------------------------------------------------------------------------------------------------------------------------------------------------------------------------------------|
|                                    |                                                   |                               | '31001_2071',<br>'31001_2072','31001_2073', '31001_2074',<br>'31001_2080',<br>'31001_2081','31001_2082', '31001_2083',<br>'31001_2090',<br>'31001_2091','31001_2092', '31001_2093',<br>'31001_2094') |
| <b>Mixed usage</b>                 | Basis-DLM [1]                                     | sie02_f                       | OBJART = '41006'                                                                                                                                                                                     |
|                                    | OSM [2] retrieved from Geofabrik [3]              | gis_osm_landuse_a_free_1      | fclass='farmyard'                                                                                                                                                                                    |
| <b>Slope</b>                       | EU-DEM v1.1 [13]                                  |                               | None                                                                                                                                                                                                 |
| <b>Birds protected areas (SPA)</b> | WDPA [8]                                          |                               | DESIG_ENG = 'Special Protection Area (Birds Directive)'                                                                                                                                              |
| <b>Nature reserve (NSG)</b>        | WDPA [8]                                          |                               | Desig='Naturschutzgebiet'                                                                                                                                                                            |
| <b>National Park</b>               | WDPA [8]                                          |                               | Desig='Nationalpark'                                                                                                                                                                                 |
| <b>Marine protected areas</b>      | WDPA [8]                                          |                               | Desig='Baltic Sea Protected Area (HELCOM)' OR<br>DESIG='Marine Protected Area (OSPAR)'                                                                                                               |
| <b>Sea depth</b>                   | ELC Inspire [14]                                  |                               | None                                                                                                                                                                                                 |
| <b>Border</b>                      | VG250 [15]                                        | VG250_STA                     | GF = 4                                                                                                                                                                                               |
| <b>Sea border</b>                  | CONTIS Administration [16]                        | Boundaries                    | None                                                                                                                                                                                                 |
|                                    | VG250                                             | VG250_STA                     | GF !=4                                                                                                                                                                                               |
| <b>Offshore Military**</b>         | Raumordnungsplan AWZ [17]                         | Defence                       | None                                                                                                                                                                                                 |
|                                    | CONTIS Administration [16]                        | Military_Practice_AreaPolygon | None                                                                                                                                                                                                 |
| <b>Offshore Pipeline</b>           | CONTIS Facility [18]                              | PipelinesLine                 | None                                                                                                                                                                                                 |
| <b>Offshore Data Cables</b>        | CONTIS Facility [18]                              | Data_CablesLine               | status = 'inUse'                                                                                                                                                                                     |
| <b>Offshore HV Cables</b>          | CONTIS Facility [18]                              | High_Voltage_CablesLine       | status != 'Unknown' and<br>status != 'OutOfUse'                                                                                                                                                      |
| <b>Offshore Platforms</b>          | CONTIS Facility [18]                              | PlatformsPoint                | status !=<br>'Decommissioned'                                                                                                                                                                        |
| <b>Priority Shipping Areas</b>     | Raumordnungsplan AWZ [17]                         | Shipping                      | Type = 'priority area'                                                                                                                                                                               |
|                                    | Niedersachsen LROP 2017<br>Neubekanntmachung [19] | LROP2017gesamt_Schifffahrt_A  | ZVS_Text =<br>'Vorranggebiet<br>Schifffahrt'                                                                                                                                                         |

|                                                                                                         |                                                                           |                                                        |
|---------------------------------------------------------------------------------------------------------|---------------------------------------------------------------------------|--------------------------------------------------------|
| Landesraum-<br>entwicklungsprogramm<br>Mecklenburg-<br>Vorpommern 2016 [20]                             | Gebiete_fuer_Schifffahrt_LEPMV2<br>016                                    | festlegung = 'Marines<br>Vorranggebiet<br>Schifffahrt' |
| Fortschreibung des<br>Landesentwicklungs-<br>plans Schleswig-Holstein<br>2010 (2. Entwurf 2020)<br>[21] | LEP_SH Entwurf 2020 Teil C<br>Hauptkarte Shapefile<br>vorrang_schifffahrt | None                                                   |

\*\*CONTIS Administration for Military in Federal States Sea, ROP for Military in EEZ

## Evaluation of land use data sets (Section 2.2)

**Table S2**

Exclusions for evaluation of land use datasets

| Criterion                          | Dataset          | Buffer  |
|------------------------------------|------------------|---------|
| <b>Airfields</b>                   | variable         | 1500 m  |
| <b>Airports</b>                    | variable         | 6000 m  |
| <b>Forests</b>                     | variable         | 0 m     |
| <b>Industrial/Commercial</b>       | variable         | 2H      |
| <b>Lakes</b>                       | variable         | 100 m   |
| <b>Mixed used areas</b>            | variable         | 2H      |
| <b>Residential areas</b>           | variable         | 3H      |
| <b>Rivers</b>                      | variable         | 100 m   |
| <b>Airfields</b>                   | variable         | 1500 m  |
| <b>Biosphere (core zones)</b>      | BFN [7]          | 300 m   |
| <b>Birds protected areas (SPA)</b> | WDPA [6]         | 300 m   |
| <b>D-VOR</b>                       | OSM [2]          | 10000 m |
| <b>FFH</b>                         | WDPA [6]         | 300 m   |
| <b>National Park</b>               | WDPA [6]         | 300 m   |
| <b>Nature reserve (NSG)</b>        | WDPA [6]         | 300 m   |
| <b>Protected Landscapes</b>        | WDPA [6]         | 0 m     |
| <b>Seismic stations</b>            | BGR [5]          | 1000 m  |
| <b>Slope &gt; 17°</b>              | EU-DEM v1.1 [16] | 0 m     |
| <b>VOR</b>                         | OSM [2]          | 15000 m |

## Onshore wind potential (Section 2.3)

**Table S3**

Onshore wind exclusions (R: Radius, D: Diameter, H: Height)

| Criterion        | Dataset       | S1          | S2     | S2a    | S2b    | S3     |
|------------------|---------------|-------------|--------|--------|--------|--------|
| <b>Airfields</b> | Basis-DLM [1] | individual* | 1500 m | 1500 m | 1500 m | 1500 m |
| <b>Airports</b>  | Basis-DLM [1] | individual* | 6000 m | 6000 m | 6000 m | 6000 m |

|                                      |                 |              |              |              |              |              |
|--------------------------------------|-----------------|--------------|--------------|--------------|--------------|--------------|
| <b>Biosphere (core zones)</b>        | BFN [9]         | individual*  | 0 m          | 0 m          | 0 m          | 500 m        |
| <b>Biosphere (Development zones)</b> | BFN [9]         | individual*  | Not excluded | Not excluded | Not excluded | 500 m        |
| <b>Biosphere (Maintenance zones)</b> | BFN [9]         | individual*  | Not excluded | Not excluded | Not excluded | 500 m        |
| <b>Birds protected areas (SPA)</b>   | WDPA [8]        | individual*  | 300 m        | 300 m        | 300 m        | 500 m        |
| <b>Border</b>                        | VG250 [15]      | individual*  | 100 m        | 100 m        | 100 m        | 100 m        |
| <b>Buildings commercial</b>          | Hausumringe [6] | individual*  | 2H           | 2H           | 2H           | 3H           |
| <b>Buildings health treatment</b>    | Hausumringe [6] | individual*  | 1000 m       | 1000 m       | 1000 m       | 1000 m       |
| <b>Buildings mixed usage</b>         | Hausumringe [6] | individual*  | 3H           | 3H           | 3H           | 3H           |
| <b>Buildings residential</b>         | Hausumringe [6] | individual*  | 3H           | 3H           | 3H           | 1000 m       |
| <b>Camping</b>                       | Basis-DLM [1]   | individual*  | 3H           | 3H           | 3H           | 1000 m       |
| <b>Cemetery</b>                      | Basis-DLM [1]   | individual*  | 0 m          | 0 m          | 0 m          | 0 m          |
| <b>D-VOR</b>                         | OSM [2]         | individual*  | 10000 m      | 10000 m      | 10000 m      | 10000 m      |
| <b>Farmland</b>                      | Not excluded    | Not excluded | Not excluded | Not excluded | Not excluded | Not excluded |
| <b>FFH</b>                           | WDPA [8]        | individual*  | 300 m        | 300 m        | 300 m        | 500 m        |
| <b>Forests</b>                       | Basis-DLM [1]   | individual*  | Not excluded | Not excluded | 0 m          | 0 m          |
| <b>Grassland</b>                     | Not excluded    | Not excluded | Not excluded | Not excluded | Not excluded | Not excluded |
| <b>Historical</b>                    | OSM [2]         | individual*  | 1000 m       | 1000 m       | 1000 m       | 1000 m       |
| <b>Industrial/Commercial</b>         | Basis-DLM [1]   | individual*  | 2H           | 2H           | 2H           | 3H           |
| <b>Inner areas</b>                   | Basis-DLM [1]   | individual*  | 1000 m       | 1000 m       | 1000 m       | 1000 m       |
| <b>Lakes</b>                         | Basis-DLM [1]   | individual*  | 100 m        | 100 m        | 100 m        | 100 m        |
| <b>Military</b>                      | Basis-DLM [1]   | individual*  | 0 m          | 0 m          | 0 m          | 0 m          |
| <b>Mineral extraction</b>            | Basis-DLM [1]   | individual*  | 0 m          | 0 m          | 0 m          | 0 m          |



|                                    |                        |             |              |              |              |         |
|------------------------------------|------------------------|-------------|--------------|--------------|--------------|---------|
| <b>Mixed usage</b>                 | Basis-DLM [1]          | individual* | 2H           | 2H           | 2H           | 3H      |
| <b>Motorway</b>                    | Basis-DLM [1]          | individual* | 40 + R       | 40 + R       | 40 + R       | 40 + R  |
| <b>National park</b>               | WDPA [8]               | individual* | 300 m        | 300 m        | 300 m        | 500 m   |
| <b>Nature park</b>                 | BFN [9]                | individual* | Not excluded | Not excluded | Not excluded | 0 m     |
| <b>Nature reserve (NSG)</b>        | WDPA [8]               | individual* | 300 m        | 300 m        | 300 m        | 500 m   |
| <b>Outer areas</b>                 | Basis-DLM [1]          | individual* | 3H           | 3H           | 3H           | 1000 m  |
| <b>Power lines</b>                 | Basis-DLM [1]          | individual* | 100 + D      | 100 + D      | 100 + D      | 100 + D |
| <b>Primary roads</b>               | Basis-DLM [1]          | individual* | 20 + R       | 20 + R       | 20 + R       | 20 + R  |
| <b>Protected landscapes</b>        | WDPA [8]               | individual* | Not excluded | 0 m          | Not excluded | 0 m     |
| <b>Railways</b>                    | Basis-DLM [1]          | individual* | 100 + D      | 100 + D      | 100 + D      | 100 + D |
| <b>Ramsar</b>                      | WDPA [8]               | individual* | Not excluded | Not excluded | Not excluded | 0 m     |
| <b>Recreational</b>                | Basis-DLM [1]          | individual* | 0 m          | 0 m          | 0 m          | 0 m     |
| <b>Regional roads</b>              | Basis-DLM [1]          | individual* | R            | R            | R            | R       |
| <b>Rivers</b>                      | Basis-DLM [1]          | individual* | 100 m        | 100 m        | 100 m        | 100 m   |
| <b>Secondary roads</b>             | Basis-DLM [1]          | individual* | R            | R            | R            | R       |
| <b>Seismic station</b>             | BGR [7]                | individual* | 1000 m       | 1000 m       | 1000 m       | 1000 m  |
| <b>Slope &gt;17°</b>               | EU-DEM v1.1 [13]       | individual* | 0 m          | 0 m          | 0 m          | 0 m     |
| <b>Stream</b>                      | OSM [2]                | individual* | 0 m          | 0 m          | 0 m          | 0 m     |
| <b>VOR</b>                         | OSM [2]                | individual* | 15000 m      | 15000 m      | 15000 m      | 15000 m |
| <b>Water protection (I&amp;II)</b> | Processed (s. Table 1) | individual* | 50 m         | 50 m         | 50 m         | 50 m    |

\* see Table 4

**Table S4**  
Exclusions for scenario 1

| <b>Criterion</b> | <b>Dataset</b> | <b>SH</b> | <b>HH</b> | <b>NI</b> | <b>HB</b> | <b>NW</b> | <b>HE</b> |
|------------------|----------------|-----------|-----------|-----------|-----------|-----------|-----------|
|------------------|----------------|-----------|-----------|-----------|-----------|-----------|-----------|

|                                      |                 |           |           |           |           |           |           |
|--------------------------------------|-----------------|-----------|-----------|-----------|-----------|-----------|-----------|
| <b>Airfields</b>                     | Basis-DLM [1]   | 1750 m    |
| <b>Airports</b>                      | Basis-DLM [1]   | 6000 m    |
| <b>Biosphere (core zones)</b>        | BFN [9]         | 0 m       | 0 m       | 0 m       | 0 m       | 0 m       | 0 m       |
| <b>Biosphere (Development zones)</b> | BFN [9]         | Not excl. | Not excl. | 0 m       | Not excl. | Not excl. | Not excl. |
| <b>Biosphere (Maintenance zones)</b> | BFN [9]         | Not excl. | Not excl. | 0 m       | Not excl. | Not excl. | 0 m       |
| <b>Birds protected areas (SPA)</b>   | WDPA [8]        | 300+R     | 300 m     | Not excl. | Not excl. | 300 m     | Not excl. |
| <b>Border</b>                        | VG250 [15]      | 100 m     |
| <b>Buildings health treatment</b>    | Hausumringe [6] | 3H        | 3H        | 3H        | 3H        | 3H        | 1000 m    |
| <b>Buildings mixed usage</b>         | Hausumringe [6] | 3H        | 3H        | 3H        | 3H        | 1000 m    | 1000 m    |
| <b>Buildings residential</b>         | Hausumringe [6] | 3H        | 3H        | 3H        | 3H        | 1000 m    | 1000 m    |
| <b>Camping</b>                       | Basis-DLM [1]   | 3H        | 3H        | 3H        | 3H        | 3H        | 3H        |
| <b>Cemetery</b>                      | Basis-DLM [1]   | 0 m       | 0 m       | 0 m       | 0 m       | 0 m       | 0 m       |
| <b>D-VOR</b>                         | OSM [2]         | 10000 m   |
| <b>Farmland</b>                      | Not excl.       | Not excl. | Not excl. | Not excl. | Not excl. | Not excl. | Not excl. |
| <b>FFH</b>                           | WDPA [8]        | 200+R     | 200 m     | Not excl. | Not excl. | 300 m     | Not excl. |
| <b>Forests</b>                       | Basis-DLM [1]   | 0 m       | 0 m       | 0 m       | 0 m       | Not excl. | Not excl. |
| <b>Grassland</b>                     | Not excl.       | Not excl. | Not excl. | Not excl. | Not excl. | Not excl. | Not excl. |
| <b>Historical</b>                    | OSM [2]         | 0 m       | 0 m       | 0 m       | 0 m       | 0 m       | 0 m       |
| <b>Industrial/Commercial</b>         | Basis-DLM [1]   | 2H        | 2H        | 2H        | 2H        | 2H        | 1000 m    |
| <b>Inner areas</b>                   | Basis-DLM [1]   | 800 m     | 3H        | 3H        | 3H        | 1000 m    | 1000 m    |
| <b>Lakes</b>                         | Basis-DLM [1]   | 50 m      |

|                                    |                        |           |           |           |         |           |           |
|------------------------------------|------------------------|-----------|-----------|-----------|---------|-----------|-----------|
| <b>Military</b>                    | Basis-DLM [1]          | 0 m       | 0 m       | 0 m       | 0 m     | 0 m       | 0 m       |
| <b>Mineral extraction</b>          | Basis-DLM [1]          | 0 m       | 0 m       | 0 m       | 0 m     | 0 m       | 0 m       |
| <b>Motorway</b>                    | Basis-DLM [1]          | 40+R      | 40+R      | 40+R      | 40+R    | 40+R      | 40+R      |
| <b>National park</b>               | WDPA [8]               | 300+R     | 0 m       | 0 m       | 0 m     | 300 m     | 0 m       |
| <b>Nature park</b>                 | BFN [9]                | Not excl. | Not excl. | Not excl. | 0 m     | Not excl. | Not excl. |
| <b>Nature reserve (NSG)</b>        | WDPA [8]               | 200+R     | 300 m     | 0 m       | 0 m     | 300 m     | 0 m       |
| <b>Outer areas</b>                 | Basis-DLM [1]          | 3H        | 3H        | 3H        | 3H      | 1000 m    | 1000 m    |
| <b>Power lines</b>                 | Basis-DLM [1]          | 2R        | 2R        | 2R        | 2R      | 100+2R    | 2R        |
| <b>Primary roads</b>               | Basis-DLM [1]          | 20+R      | 20+R      | 20+R      | 20+R    | 20+R      | 20+R      |
| <b>Protected landscapes</b>        | WDPA [8]               | Not excl. | Not excl. | Not excl. | 0 m     | 0 m       | Not excl. |
| <b>Railways</b>                    | Basis-DLM [1]          | 2R        | 2R        | 2R        | 2R      | 100+2R    | 2R        |
| <b>Ramsar</b>                      | WDPA [8]               | 300+R     | 500 m     | Not excl. | 0 m     | Not excl. | Not excl. |
| <b>Recreational</b>                | Basis-DLM [1]          | 0 m       | 0 m       | 0 m       | 0 m     | 0 m       | 0 m       |
| <b>Regional roads</b>              | Basis-DLM [1]          | R         | R         | R         | R       | R         | R         |
| <b>Rivers</b>                      | Basis-DLM [1]          | 50 m      | 50 m      | 50 m      | 50 m    | 50 m      | 50 m      |
| <b>Secondary roads</b>             | Basis-DLM [1]          | R         | R         | R         | R       | R         | R         |
| <b>Seismic station</b>             | BGR [7]                | 1000 m    | 1000 m    | 1000 m    | 1000 m  | 1000 m    | 1000 m    |
| <b>Slope &gt;17°</b>               | EU-DEM v1.1 [13]       | 0 m       | 0 m       | 0 m       | 0 m     | 0 m       | 0 m       |
| <b>Stream</b>                      | OSM [2]                | 0 m       | 0 m       | 0 m       | 0 m     | 0 m       | 0 m       |
| <b>VOR</b>                         | OSM [2]                | 15000 m   | 15000 m   | 15000 m   | 15000 m | 15000 m   | 15000 m   |
| <b>Water protection (I&amp;II)</b> | Processed (s. Table 1) | 50 m      | 50 m      | 50 m      | 50 m    | 50 m      | 50 m      |

SH=Schleswig-Holstein; HH=Hamburg; NI=Lower Saxony; HB=Bremen; NW=North Rhine Westphalia; HE=Hessen

| <b>Criterion</b>                     | <b>Dataset</b>  | <b>RP</b> | <b>BW</b> | <b>BY</b> | <b>SL</b> | <b>BE</b> |
|--------------------------------------|-----------------|-----------|-----------|-----------|-----------|-----------|
| <b>Airfields</b>                     | Basis-DLM [1]   | 1750 m    |
| <b>Airports</b>                      | Basis-DLM [1]   | 6000 m    |
| <b>Biosphere (core zones)</b>        | BFN [9]         | 0 m       | 200 m     | 0 m       | 0 m       | 0 m       |
| <b>Biosphere (Development zones)</b> | BFN [9]         | Not excl. |
| <b>Biosphere (Maintenance zones)</b> | BFN [9]         | 0 m       | Not excl. | Not excl. | 0 m       | Not excl. |
| <b>Birds protected areas (SPA)</b>   | WDPA [8]        | Not excl. | 700 m     | 10H       | 200 m     | Not excl. |
| <b>Border</b>                        | VG250 [15]      | 100 m     |
| <b>Buildings health treatment</b>    | Hausumringe [6] | 800 m     | 3H        | 3H        | 3H        | 3H        |
| <b>Buildings mixed usage</b>         | Hausumringe [6] | 3H        | 3H        | 3H        | 3H        | 3H        |
| <b>Buildings residential</b>         | Hausumringe [6] | 3H        | 3H        | 10H       | 3H        | 3H        |
| <b>Camping</b>                       | Basis-DLM [1]   | 3H        | 3H        | 3H        | 3H        | 3H        |
| <b>Cemetery</b>                      | Basis-DLM [1]   | 0 m       | 0 m       | 0 m       | 0 m       | 0 m       |
| <b>D-VOR</b>                         | OSM [2]         | 10000 m   |
| <b>Farmland</b>                      | Not excl.       | Not excl. | Not excl. | Not excl. | Not excl. | Not excl. |
| <b>FFH</b>                           | WDPA [8]        | Not excl. | Not excl. | Not excl. | 200 m     | Not excl. |
| <b>Forests</b>                       | Basis-DLM [1]   | Not excl. | Not excl. | Not excl. | Not excl. | 0 m       |
| <b>Grassland</b>                     | Not excl.       | Not excl. | Not excl. | Not excl. | Not excl. | Not excl. |
| <b>Historical</b>                    | OSM [2]         | 0 m       | 0 m       | 0 m       | 0 m       | 0 m       |
| <b>Industrial/Commercial</b>         | Basis-DLM [1]   | 2H        | 2H        | 2H        | 2H        | 2H        |
| <b>Inner areas</b>                   | Basis-DLM [1]   | 1100 m    | 3H        | 10H       | 3H        | 3H        |

|                                    |                           |              |              |              |              |              |
|------------------------------------|---------------------------|--------------|--------------|--------------|--------------|--------------|
| <b>Lakes</b>                       | Basis-DLM [1]             | 50 m         |
| <b>Military</b>                    | Basis-DLM [1]             | 0 m          | 0 m          | 0 m          | 0 m          | 0 m          |
| <b>Mineral extraction</b>          | Basis-DLM [1]             | 0 m          | 0 m          | 0 m          | 0 m          | 0 m          |
| <b>Motorway</b>                    | Basis-DLM [1]             | 40+R         | 40+R         | 40+R         | 40+R         | 40+R         |
| <b>National park</b>               | WDPA [8]                  | 0 m          | 200 m        | 0 m          | 0 m          | 0 m          |
| <b>Nature park</b>                 | BFN [9]                   | Not<br>excl. | Not<br>excl. | Not<br>excl. | Not<br>excl. | Not<br>excl. |
| <b>Nature reserve (NSG)</b>        | WDPA [8]                  | 0 m          | 200 m        | 0 m          | 200 m        | 0 m          |
| <b>Outer areas</b>                 | Basis-DLM [1]             | 3H           | 3H           | 3H           | 3H           | 3H           |
| <b>Power lines</b>                 | Basis-DLM [1]             | 2R           | 2R           | 2R           | 2R           | 2R           |
| <b>Primary roads</b>               | Basis-DLM [1]             | 20+R         | 20+R         | 20+R         | 20+R         | 20+R         |
| <b>Protected landscapes</b>        | WDPA [8]                  | Not<br>excl. | Not<br>excl. | Not<br>excl. | Not<br>excl. | Not<br>excl. |
| <b>Railways</b>                    | Basis-DLM [1]             | 2R           | 2R           | 2R           | 2R           | 2R           |
| <b>Ramsar</b>                      | WDPA [8]                  | Not<br>excl. | Not<br>excl. | Not<br>excl. | 0 m          | Not<br>excl. |
| <b>Recreational</b>                | Basis-DLM [1]             | 800 m        | 0 m          | 0 m          | 0 m          | 0 m          |
| <b>Regional roads</b>              | Basis-DLM [1]             | R            | R            | R            | R            | R            |
| <b>Rivers</b>                      | Basis-DLM [1]             | 50 m         |
| <b>Secondary roads</b>             | Basis-DLM [1]             | R            | R            | R            | R            | R            |
| <b>Seismic station</b>             | BGR [7]                   | 1000 m       |
| <b>Slope &gt;17°</b>               | EU-DEM v1.1 [13]          | 0 m          | 0 m          | 0 m          | 0 m          | 0 m          |
| <b>Stream</b>                      | OSM [2]                   | 0 m          | 0 m          | 0 m          | 0 m          | 0 m          |
| <b>VOR</b>                         | OSM [2]                   | 15000<br>m   | 15000<br>m   | 15000<br>m   | 15000<br>m   | 15000<br>m   |
| <b>Water protection (I&amp;II)</b> | Processed (s. Table<br>1) | 50 m         |

RP=Rhineland Palatinate; BW=Baden Wurttemberg; BY=Bavaria; SL=Saarland; BE=Berlin;

| <b>Criterion</b>                     | <b>Dataset</b>  | <b>BB</b> | <b>MV</b> | <b>SN</b> | <b>ST</b> | <b>TH</b> |
|--------------------------------------|-----------------|-----------|-----------|-----------|-----------|-----------|
| <b>Airfields</b>                     | Basis-DLM [1]   | 1750 m    |
| <b>Airports</b>                      | Basis-DLM [1]   | 6000 m    |
| <b>Biosphere (core zones)</b>        | BFN [9]         | 0 m       | 500 m     | 0 m       | 1000 m    | 0 m       |
| <b>Biosphere (Development zones)</b> | BFN [9]         | Not excl. | 500 m     | Not excl. | 1000 m    | 0 m       |
| <b>Biosphere (Maintenance zones)</b> | BFN [9]         | Not excl. | 500 m     | Not excl. | 1000 m    | 0 m       |
| <b>Birds protected areas (SPA)</b>   | WDPA [8]        | Not excl. | 500 m     | Not excl. | Not excl. | Not excl. |
| <b>Border</b>                        | VG250 [15]      | 100 m     |
| <b>Buildings health treatment</b>    | Hausumringe [6] | 3H        | 1000 m    | 3H        | 1200 m    | 3H        |
| <b>Buildings mixed usage</b>         | Hausumringe [6] | 3H        | 800 m     | 3H        | 3H        | 3H        |
| <b>Buildings residential</b>         | Hausumringe [6] | 3H        | 800 m     | 3H        | 3H        | 3H        |
| <b>Camping</b>                       | Basis-DLM [1]   | 3H        | 3H        | 3H        | 3H        | 3H        |
| <b>Cemetery</b>                      | Basis-DLM [1]   | 0 m       | 0 m       | 0 m       | 0 m       | 0 m       |
| <b>D-VOR</b>                         | OSM [2]         | 10000 m   |
| <b>Farmland</b>                      | Not excl.       | Not excl. | Not excl. | Not excl. | Not excl. | Not excl. |
| <b>FFH</b>                           | WDPA [8]        | Not excl. | 500 m     | Not excl. | Not excl. | Not excl. |
| <b>Forests</b>                       | Basis-DLM [1]   | Not excl. | 0 m       | 0 m       | 0 m       | 0 m       |
| <b>Grassland</b>                     | Not excl.       | Not excl. | Not excl. | Not excl. | Not excl. | Not excl. |
| <b>Historical</b>                    | OSM [2]         | 0 m       | 1000 m    | 1000 m    | 0 m       | 0 m       |
| <b>Industrial/Commercial</b>         | Basis-DLM [1]   | 2H        | 2H        | 2H        | 2H        | 2H        |
| <b>Inner areas</b>                   | Basis-DLM [1]   | 1000 m    | 1000 m    | 3H        | 1000 m    | 1000 m    |

|                                    |                           |              |              |              |              |              |
|------------------------------------|---------------------------|--------------|--------------|--------------|--------------|--------------|
| <b>Lakes</b>                       | Basis-DLM [1]             | 50 m         |
| <b>Military</b>                    | Basis-DLM [1]             | 0 m          | 0 m          | 0 m          | 0 m          | 0 m          |
| <b>Mineral extraction</b>          | Basis-DLM [1]             | 0 m          | 0 m          | 0 m          | 0 m          | 0 m          |
| <b>Motorway</b>                    | Basis-DLM [1]             | 40+R         | 40+R         | 40+R         | 40+R         | 40+R         |
| <b>National park</b>               | WDPA [8]                  | 0 m          | 1000 m       | 0 m          | 0 m          | 600 m        |
| <b>Nature park</b>                 | BFN [9]                   | Not<br>excl. | 500 m        | Not<br>excl. | Not<br>excl. | 0 m          |
| <b>Nature reserve (NSG)</b>        | WDPA [8]                  | 0 m          | 500 m        | 0 m          | 200 m        | 300 m        |
| <b>Outer areas</b>                 | Basis-DLM [1]             | 3H           | 800 m        | 3H           | 3H           | 3H           |
| <b>Power lines</b>                 | Basis-DLM [1]             | 2R           | 2R           | 2R           | 400 m        | 2R           |
| <b>Primary roads</b>               | Basis-DLM [1]             | 20+R         | 20+R         | 20+R         | 20+R         | 20+R         |
| <b>Protected landscapes</b>        | WDPA [8]                  | Not<br>excl. | Not<br>excl. | Not<br>excl. | 500 m        | Not<br>excl. |
| <b>Railways</b>                    | Basis-DLM [1]             | 2R           | 2R           | 2R           | 400 m        | 2R           |
| <b>Ramsar</b>                      | WDPA [8]                  | Not<br>excl. | Not<br>excl. | Not<br>excl. | Not<br>excl. | Not<br>excl. |
| <b>Recreational</b>                | Basis-DLM [1]             | 0 m          | 1000 m       | 0 m          | 0 m          | 0 m          |
| <b>Regional roads</b>              | Basis-DLM [1]             | R            | R            | R            | R            | R            |
| <b>Rivers</b>                      | Basis-DLM [1]             | 50 m         |
| <b>Secondary roads</b>             | Basis-DLM [1]             | R            | R            | R            | R            | R            |
| <b>Seismic station</b>             | BGR [7]                   | 1000 m       |
| <b>Slope &gt;17°</b>               | EU-DEM v1.1 [13]          | 0 m          | 0 m          | 0 m          | 0 m          | 0 m          |
| <b>Stream</b>                      | OSM [2]                   | 0 m          | 0 m          | 0 m          | 0 m          | 0 m          |
| <b>VOR</b>                         | OSM [2]                   | 15000<br>m   | 15000<br>m   | 15000<br>m   | 15000<br>m   | 15000<br>m   |
| <b>Water protection (I&amp;II)</b> | Processed (s. Table<br>1) | 50 m         |

BB=Brandenburg; MV=Mecklenburg-West Pomerania; SN=Saxony; ST=Saxony Anhalt; TH=Thuringia

## Offshore wind potential (Section 2.4)

**Table S5**

Pre-selected areas for offshore wind

| Scenario                          | Dataset                                                         | File name                                 | Filter                                                          |
|-----------------------------------|-----------------------------------------------------------------|-------------------------------------------|-----------------------------------------------------------------|
| <b>S2 Legislation</b>             | Raumordnungsplan AWZ [17]                                       | OffshoreWindEnergy                        | None                                                            |
|                                   | Landesraumentwicklungsprogramm Mecklenburg-Vorpommern 2016 [20] | Gebiete_fuer_Windenergieanlagen_LEPMV2016 | None                                                            |
|                                   | Niedersachsen LROP 2017 Neubekanntmachung [19]                  | LROP2017gesamt_windenergie                | None                                                            |
| <b>S3 Restrictive Legislation</b> | Raumordnungsplan AWZ [17]                                       | OffshoreWindEnergy                        | Type = 'priority area' OR Type = 'conditional priority area'    |
|                                   | Landesraumentwicklungsprogramm Mecklenburg-Vorpommern 2016 [20] | Gebiete_fuer_Windenergieanlagen_LEPMV2016 | festlegung != 'Marines Vorbehaltsgebiet für Windenergieanlagen' |
|                                   | Niedersachsen LROP 2017 Neubekanntmachung [19]                  | LROP2017gesamt_windenergie                | zvs_text = 'Eignungsgebiet Windenergienutzung'                  |

**Table S6**

Offshore wind exclusions

| Criterion                          | Data set               | S1      | S1a          | S2           | S3           |
|------------------------------------|------------------------|---------|--------------|--------------|--------------|
| <b>Birds protected areas (SPA)</b> | WDPA [8]               | 0       | 0            | Not excluded | Not excluded |
| <b>Border</b>                      | VG250 [15]             | 15000 m | 15.000 m     | Not excluded | Not excluded |
| <b>Data Cables</b>                 | CONTIS Facilities [18] | 500 m   | 500 m        | 500 m        | 500 m        |
| <b>HV Cables</b>                   | CONTIS Facilities [18] | 500 m   | 500 m        | 500 m        | 500 m        |
| <b>Marine protected areas</b>      | WDPA [8]               | 0       | 0            | Not excluded | Not excluded |
| <b>Military</b>                    | Processed (s. Table 1) | 0       | Not excluded | Not excluded | Not excluded |
| <b>National Park</b>               | WDPA [8]               | 0       | 0            | Not excluded | Not excluded |
| <b>Nature reserve (NSG)</b>        | WDPA [8]               | 0       | 0            | Not excluded | Not excluded |
| <b>Pipeline</b>                    | CONTIS Facilities [18] | 500 m   | 500 m        | 500 m        | 500 m        |
| <b>Platforms</b>                   | CONTIS Facilities [18] | 500 m   | 500 m        | 500 m        | 500 m        |



|                                |                        |        |        |              |              |
|--------------------------------|------------------------|--------|--------|--------------|--------------|
| <b>Priority Shipping Areas</b> | Processed (s. Table 1) | 500 m  | 500 m  | Not excluded | Not excluded |
| <b>Sea border</b>              | Processed (s. Table 1) | 500 m  | 500 m  | Not excluded | Not excluded |
| <b>Sea depth</b>               | ELC Inspire [14]       | 1000 m | 1000 m | Not excluded | Not excluded |
| <b>Seismic Stations</b>        | BGR [7]                | 1000 m | 1000 m | Not excluded | Not excluded |

## Open-field photovoltaic potential (Section 2.5)

In scenario S1 Side Strips of the open-field photovoltaic potentials, the side stripes along motorways and railways are considered as pre-selected areas. The area of the side strips are defined by extracting the line features from Basis-DLM [1] and buffering these with half of their width. For motorways either the given width of Basis-DLM [1] (key: BRF) is used or a default width of 40 m is assumed. The area of railways is defined with a default width of 10 m.

In scenario S2 and S3 areas with poor soil quality are used as pre-selected ones. These are defined by the overlap of the Soil Quality Data SQR [22] and farmland areas, identified by Basis-DLM [1] (File: veg01\_f; Filter: VEG='1010' ). The resulting areas are named “Processed SQR” in the following.

**Table S7**

Pre-selected areas for open-field photovoltaic

| Scenario              | Preselected Area |          | Dataset       | File name | Filter                                                        | Distance |
|-----------------------|------------------|----------|---------------|-----------|---------------------------------------------------------------|----------|
| <b>S1 Side Strips</b> | Railways         | Included | Basis-DLM [1] | ver03_1   | ZUS != '2100' OR ZUS is null) AND HDU_X = 0 AND BKT='1100'    | 200      |
|                       |                  | Excluded | Basis-DLM [1] | ver03_1   | ZUS != '2100' OR ZUS is null) AND HDU_X = 0 AND BKT='1100'    | 15       |
|                       | Motorway         | Included | Basis-DLM [1] | ver01_1   | (ZUS != '2100' OR ZUS is null) AND HDU_X = 0 AND WDM = '1301' | 200      |
|                       |                  | Excluded | Basis-DLM [1] | ver01_1   | (ZUS != '2100' OR ZUS is null) AND HDU_X = 0 and WDM = '1301' | 15       |
| <b>S2 Poor Soil</b>   | Farmland         | Included | Processed SQR |           | <i>Values &lt; 30</i>                                         |          |
| <b>S3 Combination</b> | Railways         | Included | Basis-DLM [1] | ver03_1   | ZUS != '2100' OR ZUS is null) AND HDU_X = 0 AND BKT='1100'    | 200      |
|                       |                  | Excluded | Basis-DLM [1] | ver03_1   | ZUS != '2100' OR ZUS is null) AND HDU_X = 0 AND BKT='1100'    | 15       |
|                       |                  |          | Processed SQR |           | <i>Values &gt; 40</i>                                         |          |

|          |          |               |         |                                                               |     |
|----------|----------|---------------|---------|---------------------------------------------------------------|-----|
| Motorway | Included | Basis-DLM [1] | ver01_1 | (ZUS != '2100' OR ZUS is null) AND HDU_X = 0 AND WDM = '1301' | 200 |
|          | Excluded | Basis-DLM [1] | ver01_1 | (ZUS != '2100' OR ZUS is null) AND HDU_X = 0 and WDM = '1301' | 15  |
|          |          | Processed SQR |         | <i>Values &gt; 40</i>                                         |     |
| Farmland | Included | Processed SQR |         | <i>Values &lt; 30</i>                                         |     |
|          | Excluded | Basis-DLM [1] | ver03_1 | ZUS != '2100' OR ZUS is null) AND HDU_X = 0 AND BKT='1100'    | 200 |
|          |          | Basis-DLM [1] | ver01_1 | (ZUS != '2100' OR ZUS is null) AND HDU_X = 0 AND WDM = '1301' | 200 |

**Table S8**  
Open-field photovoltaic exclusions

| Criterion                          | Dataset         | S1    | S2    | S3    |
|------------------------------------|-----------------|-------|-------|-------|
| <b>Birds protected areas (SPA)</b> | WDPA [8]        | 0 m   | 0 m   | 0 m   |
| <b>Border</b>                      | VG250 [15]      | 100 m | 100 m | 100 m |
| <b>Buildings all</b>               | Hausumringe [6] | 0 m   | 0 m   | 0 m   |
| <b>Camping</b>                     | Basis-DLM [1]   | 10 m  | 10 m  | 10 m  |
| <b>Cemetery</b>                    | Basis-DLM [1]   | 0 m   | 0 m   | 0 m   |
| <b>FFH</b>                         | WDPA [8]        | 0 m   | 0 m   | 0 m   |
| <b>Forests</b>                     | Basis-DLM [1]   | 10 m  | 10 m  | 10 m  |
| <b>Historical</b>                  | OSM [2]         | 0 m   | 0 m   | 0 m   |
| <b>Industrial/Commercial</b>       | Basis-DLM [1]   | 0 m   | 0 m   | 0 m   |
| <b>Inner areas</b>                 | Basis-DLM [1]   | 0 m   | 0 m   | 0 m   |
| <b>Lakes</b>                       | Basis-DLM [1]   | 10 m  | 10 m  | 10 m  |
| <b>Military</b>                    | Basis-DLM [1]   | 0 m   | 0 m   | 0 m   |

|                             |                  |             |        |             |
|-----------------------------|------------------|-------------|--------|-------------|
| <b>Mineral extraction</b>   | Basis-DLM [1]    | 0 m         | 0 m    | 0 m         |
| <b>Motorway</b>             | Basis-DLM [1]    | See Table 7 | 200 m  | See Table 7 |
| <b>National park</b>        | WDPA [8]         | 0 m         | 0 m    | 0 m         |
| <b>Nature reserve (NSG)</b> | WDPA [8]         | 0 m         | 0 m    | 0 m         |
| <b>Outer areas</b>          | Basis-DLM [1]    | 0 m         | 0 m    | 0 m         |
| <b>Power lines</b>          | Basis-DLM [1]    | 20 m        | 20 m   | 20 m        |
| <b>Primary roads</b>        | Basis-DLM [1]    | 22.5 m      | 22.5 m | 22.5 m      |
| <b>Railways</b>             | Basis-DLM [1]    | See Table 7 | 200 m  | See Table 7 |
| <b>Recreational</b>         | Basis-DLM [1]    | 0 m         | 0 m    | 0 m         |
| <b>Regional roads</b>       | Basis-DLM [1]    | 22.5 m      | 22.5 m | 22.5 m      |
| <b>Rivers</b>               | Basis-DLM [1]    | 10 m        | 10 m   | 10 m        |
| <b>Secondary roads</b>      | Basis-DLM [1]    | 22.5 m      | 22.5 m | 22.5 m      |
| <b>Slope &gt;10°</b>        | EU-DEM v1.1 [13] | 0 m         | 0 m    | 0 m         |
| <b>Stream</b>               | OSM [2]          | 10 m        | 10 m   | 10 m        |
| <b>Trees</b>                | Basis-DLM [1]    | 10 m        | 10 m   | 10 m        |

- [1] Geobasisdaten: © GeoBasis-DE / BKG (2021), 'Digitales Basis-Landschaftsmodell (Ebenen) (Basis-DLM)'. 2021.
- [2] OpenStreetMap contributors, 'OpenStreetMap', 2017. <https://www.openstreetmap.org> (accessed Nov. 12, 2020).
- [3] Geofabrik GmbH, 'OpenStreetMap Data Extracts', 2022. <http://download.geofabrik.de/>
- [4] Copernicus Programme, 'CORINE Land Cover (CLC)'. 2018. Accessed: Jun. 13, 2021. [Online]. Available: <https://land.copernicus.eu/pan-european/corine-land-cover>
- [5] Overpass Contributors, 'Overpass Turbo', 2022. <https://overpass-turbo.eu/>
- [6] Geobasisdaten: © GeoBasis-DE / BKG (2021), 'Amtliche Hausumringe Deutschland (HU-DE)'. 2021.
- [7] Bundesanstalt für Geowissenschaften und Rohstoffe (BGR), 'Informationen zu deutschen Seismometer-Stationen'. [Online]. Available: [https://www.bgr.bund.de/DE/Themen/Erdbeben-Gefahrungsanalysen/Seismologie/Seismologie/Seismometer\\_Stationen/Stationsinfos/d\\_stationen\\_node.html](https://www.bgr.bund.de/DE/Themen/Erdbeben-Gefahrungsanalysen/Seismologie/Seismologie/Seismometer_Stationen/Stationsinfos/d_stationen_node.html)
- [8] UNEP-WCMC, IUCN, 'The world database on protected areas'. 2016. Accessed: Oct. 22, 2021. [Online]. Available: <https://www.protectedplanet.net/>
- [9] © Bundesamt für Naturschutz (2021), 'BfN-Datensatz'. 2021.
- [10] © WasserBLiK/BfG und Zuständige Behörden der Länder, 2020, 'BfG-Datensatz'. 2020. [Online]. Available: <https://www.geoportal.de/Metadata/52d1b6ab-31c7-491b-96c8-be22a31d7313>
- [11] © Landesamt für Umwelt Rheinland-Pfalz, 'Landesamt für Umwelt Rheinland-Pfalz - Wasserschutz'. 2021.
- [12] © Landesanstalt für Umwelt Baden-Württemberg (LUBW), 'Daten- und Kartendienst der LUBW - Wasserschutzgebiete'. 2021. [Online]. Available: <https://udo.lubw.baden-wuerttemberg.de/public/index.xhtml>
- [13] Copernicus Programme, 'European Digital Elevation Model (EU-DEM v1.1)'. 2016. [Online]. Available: <https://land.copernicus.eu/imagery-in-situ/eu-dem/eu-dem-v1.1>
- [14] Bundesamt für Seeschifffahrt und Hydrographie, 'Höhe (Bathymetrie) - INSPIRE-Download-Service'. Jun. 27, 2021. Accessed: Nov. 22, 2021. [Online]. Available: <https://www.geoseaportal.de/csw/record/6fe1bb6a-c915-45fe-b84c-d88e4aec55c1>
- [15] Geobasisdaten: © GeoBasis-DE / BKG (2020), 'Verwaltungsgebiete 1:250 000 (VG250)'. 2020. Accessed: Jul. 05, 2021. [Online]. Available: <https://gdz.bkg.bund.de/index.php/default/verwaltungsgebiete-1-250-000-ebenen-stand-01-01-vg250-ebenen-01-01.html>
- [16] Bundesamt für Seeschifffahrt und Hydrographie, 'CONTIS Administration - WMS'. Jan. 01, 2019. [Online]. Available: [https://www.geoseaportal.de/wss/service/CONTIS\\_Administration/guest?SERVICE=WMS&REQUEST=GetCapabilities&VERSION=1.3.0](https://www.geoseaportal.de/wss/service/CONTIS_Administration/guest?SERVICE=WMS&REQUEST=GetCapabilities&VERSION=1.3.0)
- [17] Bundesamt für Seeschifffahrt und Hydrographie, 'Raumordnungsplan AWZ – WMS'. Sep. 01, 2021. Accessed: Sep. 01, 2021. [Online]. Available: <https://www.geoseaportal.de/mapapps/resources/apps/meeresnutzung/index.html?lang=de>
- [18] Bundesamt für Seeschifffahrt und Hydrographie, 'CONTIS Facilities'. 2020. Accessed: Nov. 08, 2021. [Online]. Available: [https://gdiwiki.bsh.de/wiki/index.php/CONTIS\\_Facilities](https://gdiwiki.bsh.de/wiki/index.php/CONTIS_Facilities)
- [19] Niedersächsisches Ministerium für Ernährung, Landwirtschaft und Verbraucherschutz, 'Neubekanntmachung der LROP-Verordnung 2017'. 2017. [Online]. Available: [https://www.ml.niedersachsen.de/startseite/themen/raumordnung\\_landesplanung/landesraumordnungsprogramm/datenabgabe\\_lrop\\_2017/neubekanntmachung-der-lrop-verordnung-2017-158625.html](https://www.ml.niedersachsen.de/startseite/themen/raumordnung_landesplanung/landesraumordnungsprogramm/datenabgabe_lrop_2017/neubekanntmachung-der-lrop-verordnung-2017-158625.html)
- [20] Ministerium für Energie, Infrastruktur und Digitalisierung, 'Landesraumentwicklungsprogramm Mecklenburg-Vorpommern 2016 (LEP M-V 2016)'. 2016. Accessed: Sep. 21, 2021. [Online]. Available: <https://www.regierung-mv.de/Landesregierung/em/Raumordnung/Landesraumentwicklungsprogramm/aktuelles-Programm/>
- [21] Landesplanung Schleswig-Holstein/MILIG, 'Fortschreibung des Landesentwicklungsplans Schleswig-Holstein 2010 (2. Entwurf 2020)'. 2021. Accessed: Sep. 20, 2021. [Online]. Available: <https://www.bolapla-sh.de/verfahren/bf4796a7-f729-11ea-a85e-0050569710bc/public/detail#procedureDetailsDocumentlist>
- [22] 'Ackerbauliches Ertragspotenzial der Böden in Deutschland 1:1.000.000. Datenquelle: SQR1000 V1.0'. 2013.
